# Supplementary material
Source: PubMed Central journal article supplement (PMC2735584)
Supplement: NIHMS86495-supplement-1_si_001.pdf [file NIHMS86495-supplement-1_si_001.pdf]

**Supporting Information for:**

**“Rapid Detection of High Charge Density Polyanion Contaminants in  
Biomedical Heparin Preparations Using Potentiometric Polyion Sensors”**

**Lin Wang, Stacey Buchanan<sup>+</sup> and Mark E. Meyerhoff<sup>\*</sup>**

*Department of Chemistry, University of Michigan, 930 North University Avenue, Ann  
Arbor, Michigan 48109-1055*

**Chemical structures of heparin, OSCS and DS and detailed potentiometric response data of the polyanion sensors toward mixtures with different content of DS and porcine heparin at different final total polyanion concentrations are shown.**

---

<sup>\*</sup> To whom correspondence should be addressed. E-mail: mmeyerho@umich.edu. Phone: (734) 763-5916. Fax: (734) 647-4865.

<sup>+</sup> Present address: Department of Chemistry, Henry Ford Community College, 5101 Evergreen Road, Dearborn, Michigan 48128

---

**Table 1S (A). Potentiometric response of PVC membranes doped with TDMAC toward polyanion samples with different ratios of DS and porcine heparin <sup>a</sup>**

| <b>DS wt% in polyanion preparations</b> | <b>Avg. <math>\Delta</math>EMF (mV) <sup>b</sup></b> | <b>SD (mV) <sup>c</sup></b> |
|-----------------------------------------|------------------------------------------------------|-----------------------------|
| 100                                     | -105.0                                               | 2.1                         |
| 20                                      | -104.2                                               | 1.0                         |
| 10                                      | -102.6                                               | 0.6                         |
| 1.0                                     | -97.9                                                | 0.5                         |

- a. The final polyanion concentration is 1 mg/mL.
- b. EMF values were recorded 10 min after the injection of polyanion solutions
- c. The standard deviations were calculated using data collected from 4 sensors for each concentration.
- 

---

**Table 1S (B). Potentiometric response of PVC membranes doped with TDMAC toward polyanion samples with different ratios of DS and porcine heparin <sup>a</sup>**

| <b>DS wt% in polyanion preparations</b> | <b>Avg. <math>\Delta</math>EMF (mV) <sup>b</sup></b> | <b>SD (mV) <sup>c</sup></b> |
|-----------------------------------------|------------------------------------------------------|-----------------------------|
| 100                                     | -107.2                                               | 1.2                         |
| 20                                      | -104.8                                               | 0.9                         |
| 10                                      | -104.5                                               | 1.5                         |
| 1.0                                     | -102.2                                               | 2.3                         |
| 0.2                                     | -101.5                                               | 0.8                         |

- a. The final polyanion concentration is 5 mg/mL.
- b. EMF values were recorded 10 min after the injection of polyanion solutions
- c. The standard deviations were calculated using data collected from 4 sensors for each concentration.
-

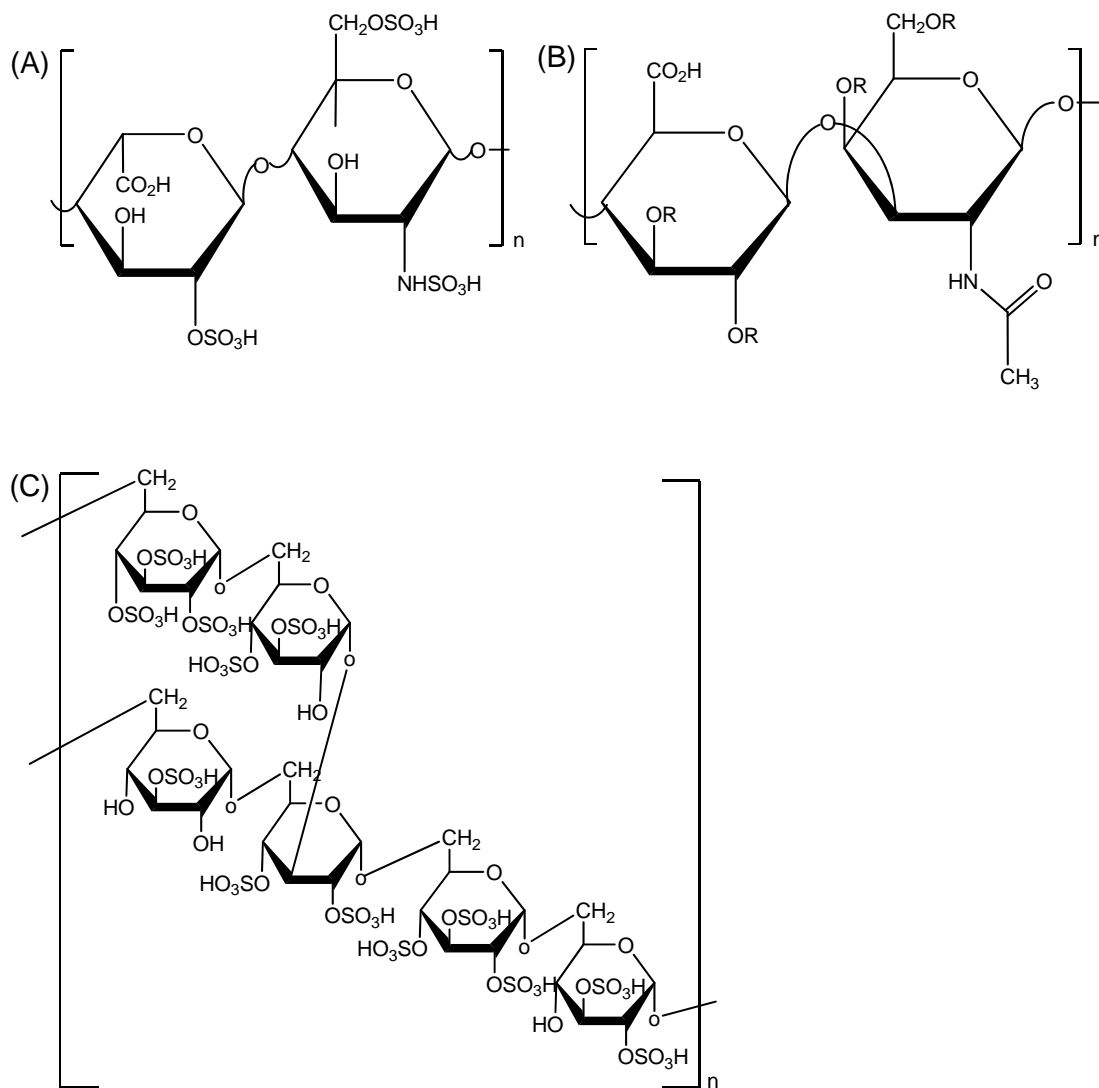

**Figure Legend for Supporting Information:**

**Figure 1S.** Chemical structures of heparin (A), OSCS (B) ( $\text{R} = \text{SO}_3\text{H}$  for fully sulfated OSCS,  $\text{R} = \text{H}$  or  $\text{SO}_3\text{H}$  for partially sulfated OSCS,  $\text{R} = \text{H}$  for CS), and DS (C)
